# Supplementary material for: Beyond Average Hand Hygiene Compliance: Performance Instability and Critical Low-Compliance Days Are Associated With Healthcare-Associated Infection Incidence in Intensive Care Units
Source: Research Square preprint supplement (doi:10.21203/rs.3.rs-8460837/v1), 2026-01-21
Supplement: Supplementary file 1 [file 5cd2725ace2550d016399643.pdf]

# STROBE Statement—Checklist of items that should be included in reports of observational studies

**Study design:** Prospective observational study

**Manuscript title:** *Beyond Average Hand Hygiene Compliance: Performance Instability and Critical Low-Compliance Days Are Associated With Healthcare-Associated Infection Incidence in Intensive Care Units*

| Section / Item            | Item No. | Recommendation                                                                  | Reported on page       |
|---------------------------|----------|---------------------------------------------------------------------------------|------------------------|
| <b>Title and abstract</b> | 1(a)     | Indicate the study's design in the title or the abstract                        | Title; Abstract        |
|                           | 1(b)     | Provide an informative and balanced summary of what was done and what was found | Abstract               |
| <b>Introduction</b>       | 2        | Explain the scientific background and rationale                                 | pp. 3–5                |
|                           | 3        | State specific objectives, including prespecified hypotheses                    | p. 5                   |
| <b>Methods</b>            | 4        | Present key elements of study design early in the paper                         | p. 6                   |
|                           | 5        | Describe the setting, locations, and relevant dates                             | p. 6                   |
|                           | 6(a)     | Give eligibility criteria and selection of participants                         | p. 6                   |
|                           | 7        | Clearly define all outcomes, exposures, predictors                              | pp. 7–8                |
|                           | 8        | Describe data sources and measurement methods                                   | pp. 6–8                |
|                           | 9        | Describe efforts to address potential sources of bias                           | pp. 6–7                |
|                           | 10       | Explain how the study size was arrived at                                       | p. 13<br>(Limitations) |
|                           | 11       | Explain handling of quantitative variables                                      | pp. 7–8                |
|                           | 12(a)    | Describe all statistical methods                                                | p. 9                   |
|                           | 12(b)    | Describe methods to examine subgroups/interactions                              | Not applicable         |
|                           | 12(c)    | Explain how missing data were addressed                                         | p. 10                  |
| <b>Results</b>            | 12(d)    | Describe analytical methods accounting for sampling strategy                    | p. 7                   |
|                           | 12(e)    | Describe sensitivity analyses                                                   | Not applicable         |
|                           | 13(a)    | Report numbers of individuals at each stage                                     | p. 11                  |
|                           | 13(b)    | Give reasons for non-participation                                              | Not applicable         |
|                           | 13(c)    | Consider use of a flow diagram                                                  | Not applicable         |
|                           | 14(a)    | Give characteristics of study participants                                      | p. 11                  |
|                           | 14(b)    | Indicate number of participants with missing data                               | p. 10                  |
|                           | 15       | Report outcome events or summary measures                                       | pp. 11–12              |

|                          |       |                                                                  |                        |
|--------------------------|-------|------------------------------------------------------------------|------------------------|
|                          | 16(a) | Give unadjusted estimates and precision                          | pp. 11–12;<br>Table 1  |
|                          | 16(b) | Report category boundaries when continuous variables categorized | p. 8                   |
|                          | 16(c) | Translate estimates of relative risk into absolute risk          | Not applicable         |
|                          | 17    | Report other analyses                                            | Table 2; Figures 1–2   |
| <b>Discussion</b>        | 18    | Summarize key results with reference to objectives               | pp. 14–15              |
|                          | 19    | Discuss limitations                                              | pp. 16–17              |
|                          | 20    | Provide cautious overall interpretation                          | pp. 14–18              |
|                          | 21    | Discuss generalisability                                         | p. 17                  |
| <b>Other information</b> | 22    | Give the source of funding and role of funders                   | Declarations (Funding) |
